# Supplementary material for: Investigation on the cellular mechanism of Prunetin evidenced through next generation sequencing and bioinformatic approaches against gastric cancer
Source: PubMed Central journal article supplement (PMC9279440; doi:10.1038/s41598-022-15826-y), 2022-07-13
Supplement: 41598_2022_15826_MOESM1_ESM.pdf [file 41598_2022_15826_MOESM1_ESM.pdf]

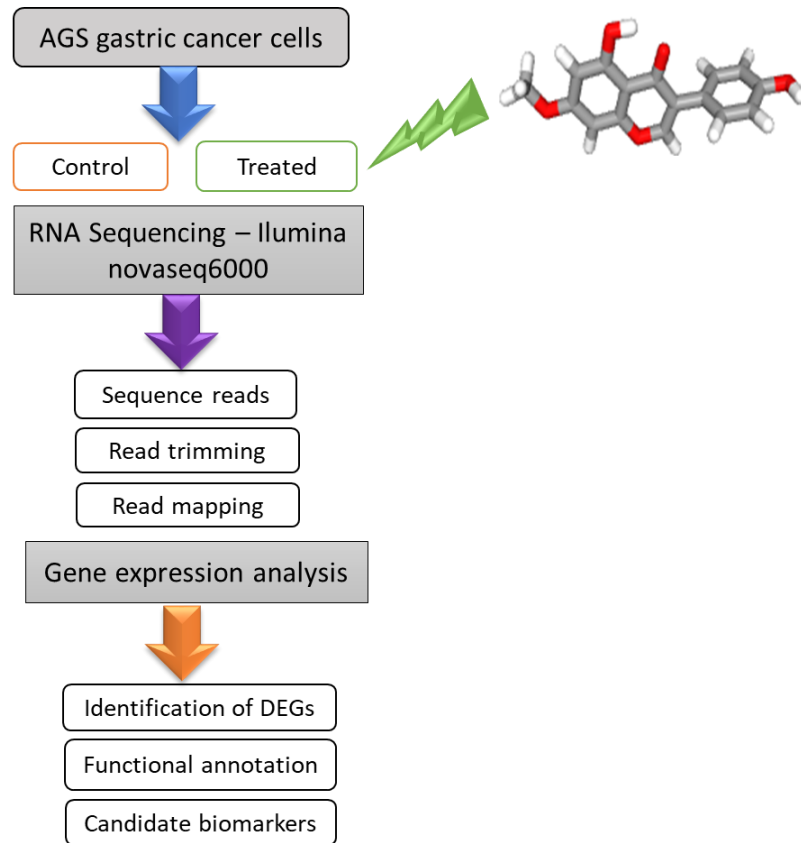

**Fig. S1.** Comprehensive workflow of transcriptome profiling for the identification of candidate biomarkers on prunetin against gastric cancer.

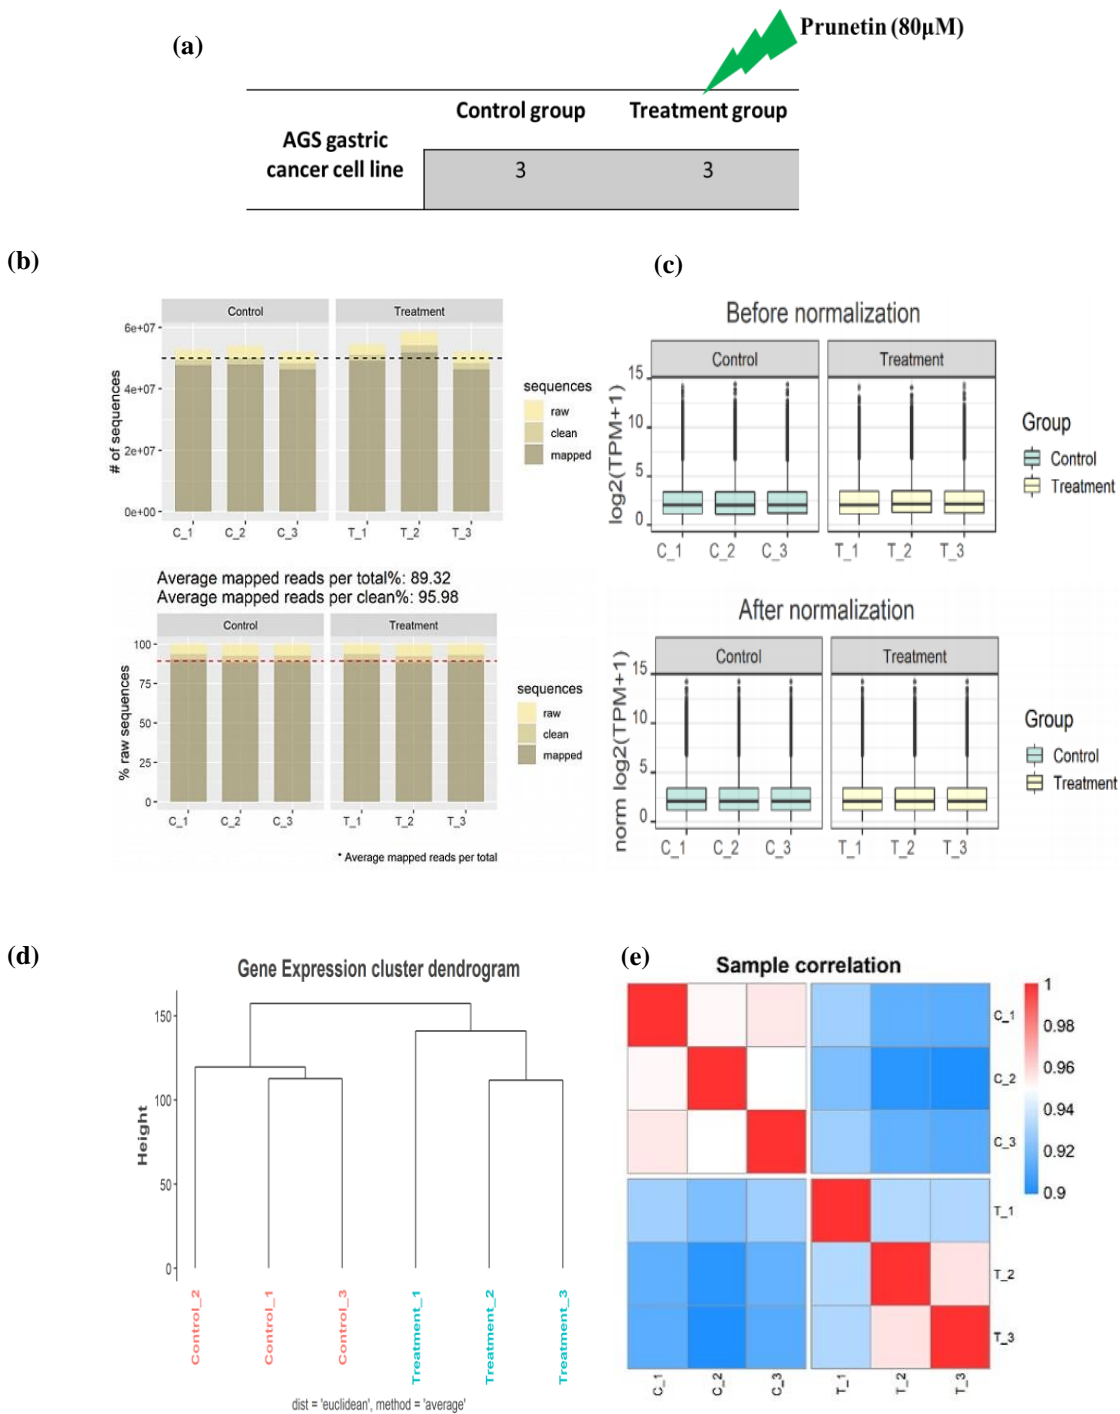

**Fig. S2. Sequencing statistics and preprocessing of reads.** (a) AGS cells were distinguished in two groups as control/untreated (0 µM) and treated with PRU (80 µM). (b) Bar diagram of average raw reads mapped to obtain total clean reads. (c) Normalization of total reads in control and treatment groups based on log<sub>2</sub> (TPM). (d) Dendrogram of gene expression clustered based in Euclidean distance method. (e) Heat map showing the correlation of the samples in two conditions. (Read counts  $\geq 5$ , TPM  $\geq 0.3$  were considered at least in one condition)

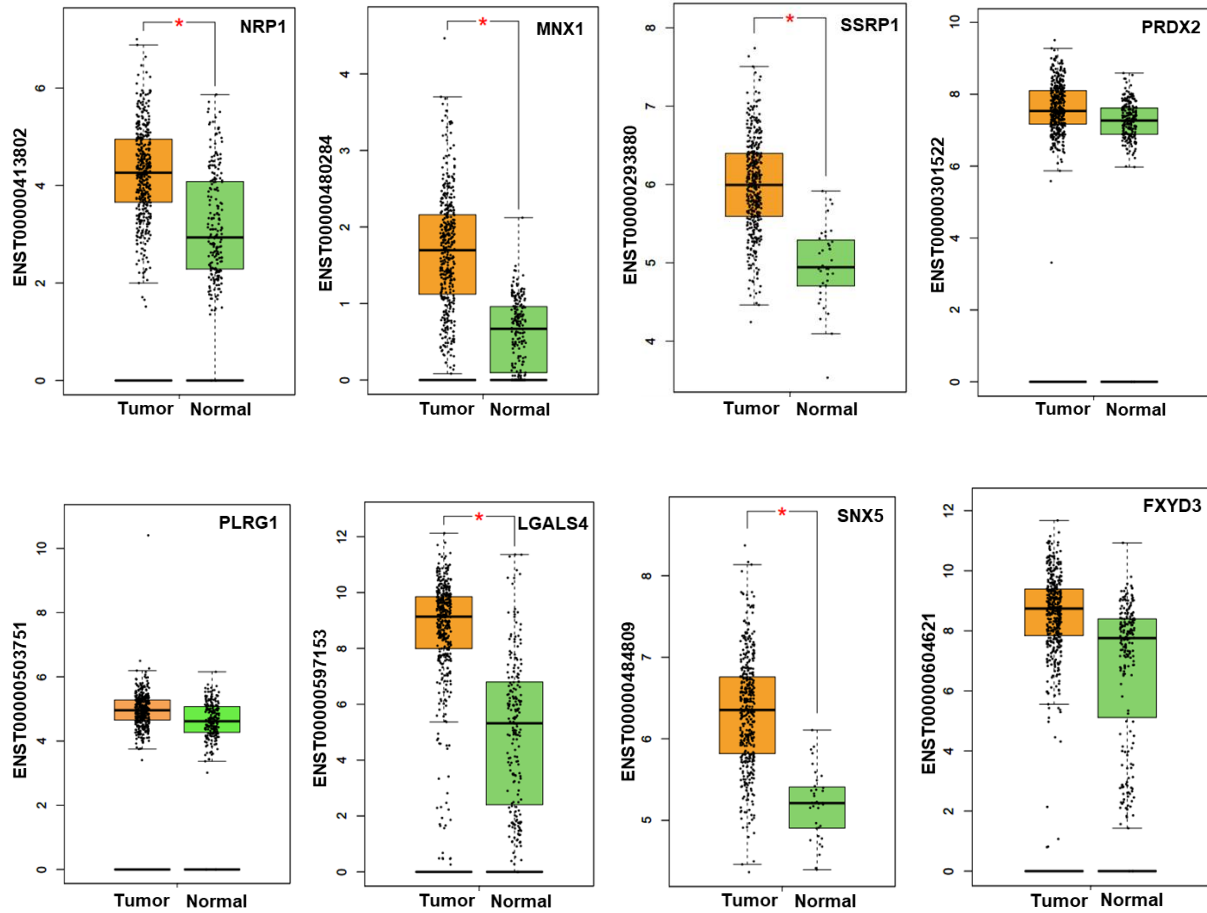

**Fig. S3. Validation of the candidate genes.** Boxplots of *NRP1*, *MNX1*, *SSRP1*, *PRDX2*, *PLRG1*, *LGALS4*, *SNX5* and *FXYD3* genes represented based on TCGA and GTEx data in GEPIA. The orange and green boxes represents STAD tissues and normal tissues, respectively. [STAD: Stomach adenocarcinoma].

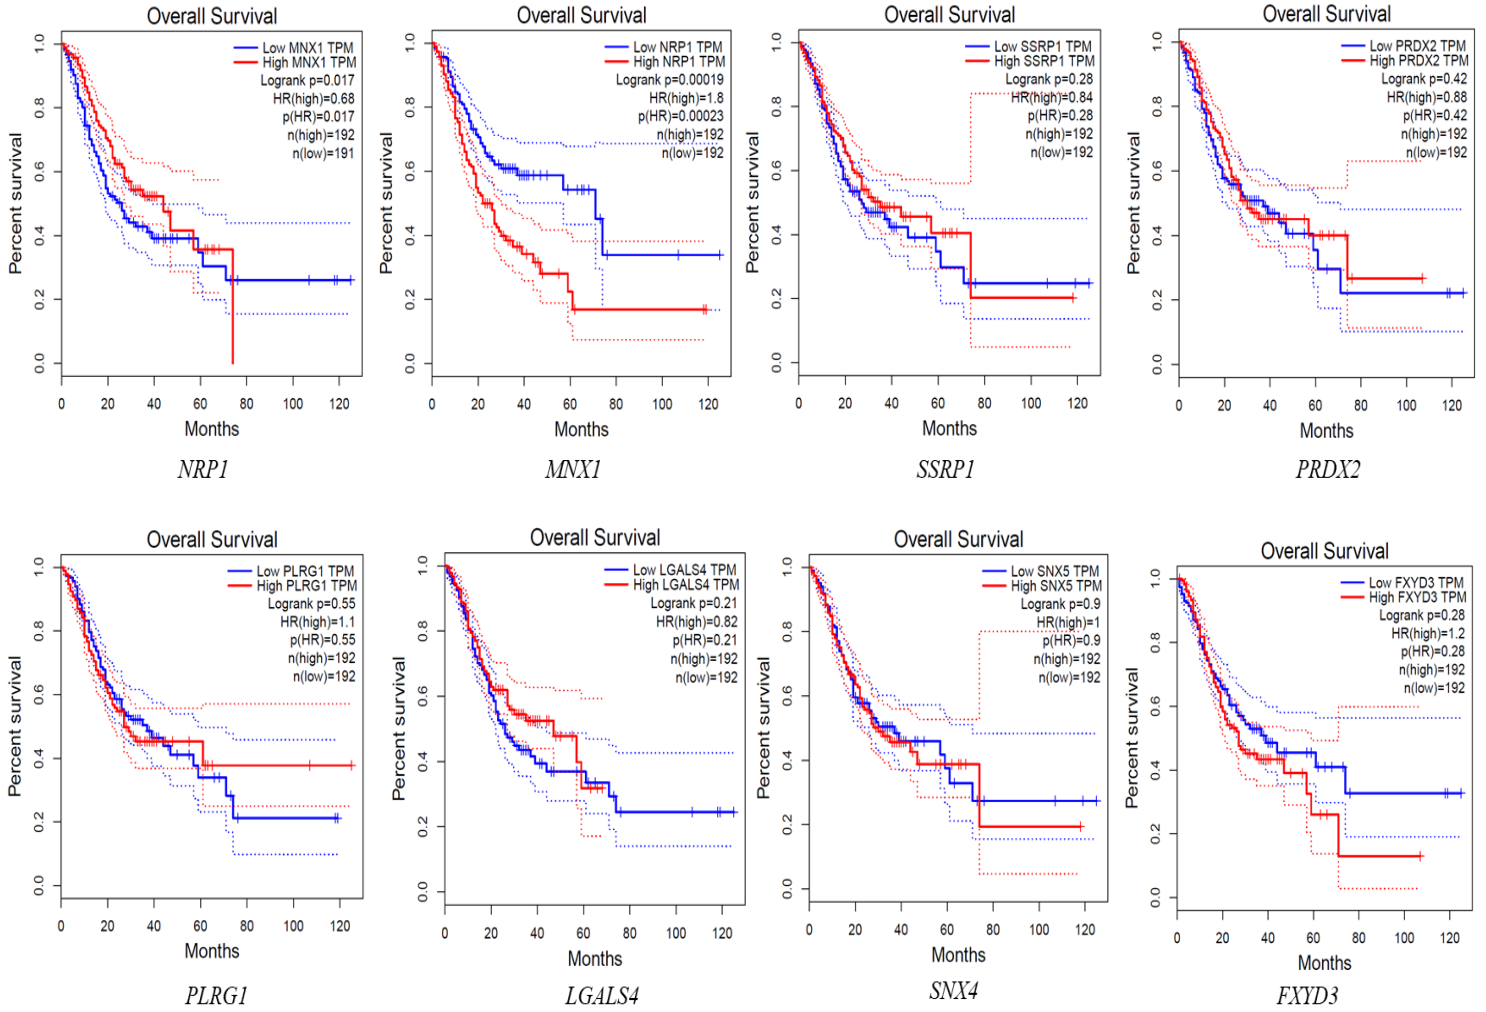

**Fig. S4. Survival analysis of the candidate genes through GIEPA.** Survival plot for the selected candidate genes were plotted through GIEPA analysis using TCGA datasets on Stomach adenocarcinoma (STAD).

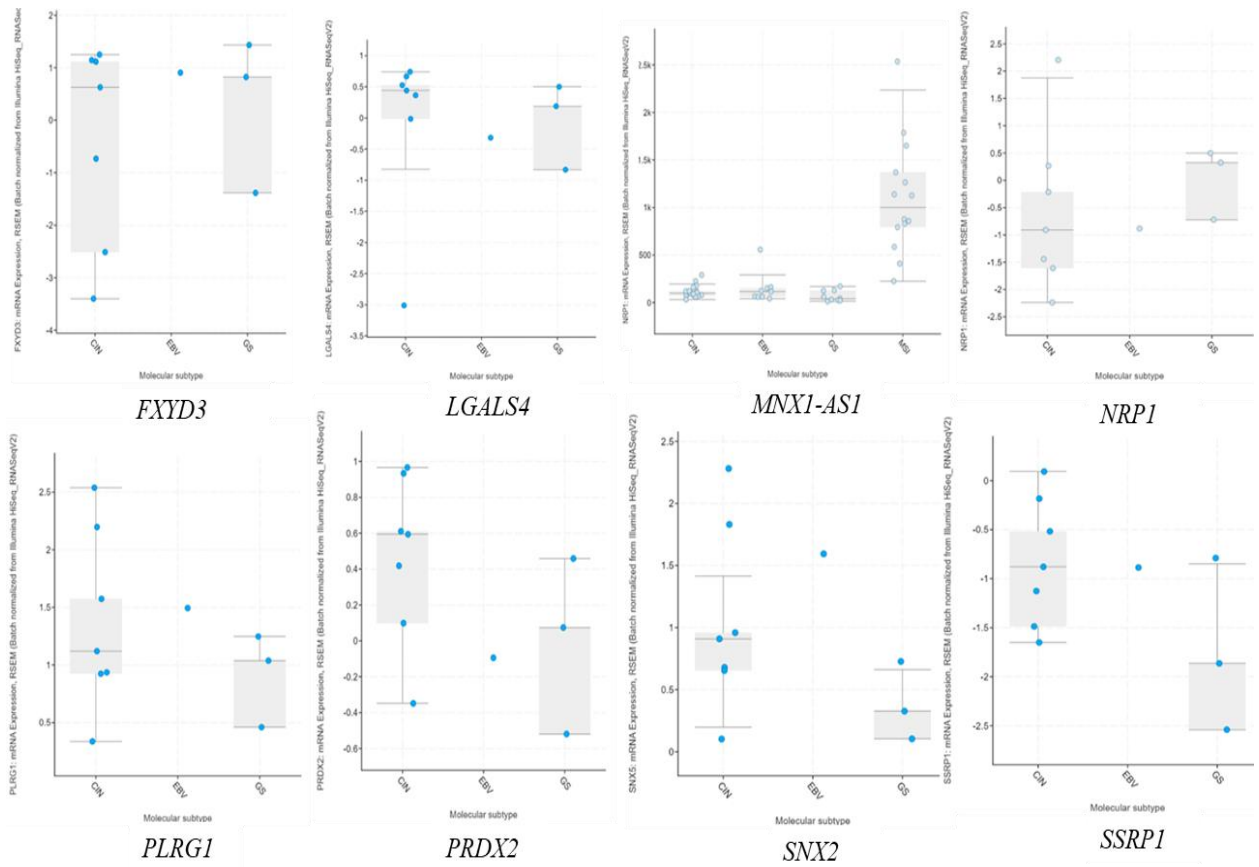

**Fig. S5. Expression of the candidate genes in different GC molecular subtypes using cBioportal.** Box plot representation of the candidate genes in different molecular subtypes (Epstein Barr virus-EBV, microsatellite instability-MSI, genomically stable-GS, and chromosomal instability-CIN).

**Table S1a.** Preprocessed read counts

(a)

| Sample         | Raw sequences | Raw nucleotides  | Clean_sequences | Clean_nucleotides |
|----------------|---------------|------------------|-----------------|-------------------|
| C_1            | 52,788,970    | 5,331,685,970    | 49,493,720      | 4,972,141,207     |
| C_2            | 54,096,752    | 5,463,771,952    | 50,111,546      | 5,034,108,278     |
| C_3            | 52,107,172    | 5,262,824,372    | 48,376,722      | 4,860,402,564     |
| T_1            | 54,580,764    | 5,512,657,164    | 51,097,056      | 5,133,653,011     |
| T_2            | 58,622,196    | 5,920,841,796    | 54,184,500      | 5,442,985,130     |
| T_3            | 51,995,832    | 5,251,579,032    | 48,396,794      | 4,861,280,841     |
| <b>Sums</b>    | 324,191,686   | 32,743,360,286   | 301,660,338     | 30,304,571,031    |
| <b>Average</b> | 54,031,947.67 | 5,457,226,714.33 | 50,276,723      | 5,050,761,838.50  |

**Table S1b.** Read mapping statistics

(b)

| Sample         | Clean_sequences (%) | Clean_nucleotides (%) | Genome_mapped sequences | Mapping rate (%) |
|----------------|---------------------|-----------------------|-------------------------|------------------|
| C_1            | 93.76               | 93.26                 | 47,740,968              | 90.44            |
| C_2            | 92.63               | 92.14                 | 47,899,304              | 88.54            |
| C_3            | 92.84               | 92.35                 | 46,375,358              | 89               |
| T_1            | 93.62               | 93.12                 | 49,249,600              | 90.23            |
| T_2            | 92.43               | 91.93                 | 51,872,918              | 88.49            |
| T_3            | 93.08               | 92.57                 | 46,390,176              | 89.22            |
| <b>Sums</b>    | -                   | -                     | 289,528,324             | -                |
| <b>Average</b> | 93.06               | 92.56                 | 48,254,720.67           | 89.32            |

**Table S2.** Top 10 significant GO terms of necroptosis DEGs in terms of cellular component

| <b>Significant GO terms</b> | <b>Description</b>                                 | <b>P value</b> | <b>Associated genes</b>                                                            |
|-----------------------------|----------------------------------------------------|----------------|------------------------------------------------------------------------------------|
| GO:0031264                  | death-inducing signaling complex                   | 3.60E-12       | <i>RIPK1,FADD,CASP8,TRADD</i>                                                      |
| GO:0005737                  | cytoplasm                                          | 3.96E-12       | <i>RIPK1,TRAF2,CYLD,BIRC2,MLKL,TLR4,FADD,CASP8,TLR3,TRADD,MAPK8,TRAF5,CASP8AP2</i> |
| GO:0045121                  | membrane raft                                      | 2.84E-10       | <i>RIPK1,TRAF2,BIRC2,FADD,CASP8,TRADD</i>                                          |
| GO:0097342                  | ripiptosome                                        | 2.88E-09       | <i>RIPK1,FADD,CASP8</i>                                                            |
| GO:0005829                  | cytosol                                            | 1.40E-08       | <i>RIPK1,TRAF2,CYLD,BIRC2,MLKL,FADD,CASP8,TRADD,MAPK8,TRAF5</i>                    |
| GO:0035631                  | CD40 receptor complex                              | 1.59E-08       | <i>TRAF2,BIRC2,TRAF5</i>                                                           |
| GO:0032991                  | protein-containing complex                         | 3.63E-08       | <i>RIPK1,TRAF2,BIRC2,FADD,CASP8,TRADD</i>                                          |
| GO:0002947                  | tumor necrosis factor receptor superfamily complex | 1.98E-06       | <i>TRAF2,TRADD</i>                                                                 |
| GO:0009898                  | cytoplasmic side of plasma membrane                | 1.99E-06       | <i>TRAF2,BIRC2,TRAF5</i>                                                           |
| GO:0098802                  | plasma membrane signaling receptor complex         | 4.04E-06       | <i>TRAF2,TRAF5</i>                                                                 |

**Table S3.** Top 10 significant GO terms of necroptosis DEGs in terms of molecular function

| <b>Significant GO terms</b> | <b>Description</b>                                                             | <b>P value</b> | <b>Associated genes</b>                                           |
|-----------------------------|--------------------------------------------------------------------------------|----------------|-------------------------------------------------------------------|
| GO:0010803                  | Regulation of tumor necrosis factor-mediated signaling pathway                 | 3.13E-18       | <i>RIPK1, TRAF2, CYLD, BIRC2, FADD, CASP8, TRADD</i>              |
| GO:0043123                  | Positive regulation of I-kappaB kinase/NF-kappaB signaling                     | 5.07E-18       | <i>RIPK1, TRAF2, BIRC2, TLR4, FADD, CASP8, TLR3, TRADD, TRAF5</i> |
| GO:0060544                  | Regulation of necroptosis process                                              | 1.07E-16       | <i>RIPK1, CYLD, BIRC2, MLKL, FADD, CASP8</i>                      |
| GO:0070266                  | Necroptotic process                                                            | 2.22E-16       | <i>RIPK1, CYLD, BIRC2, MLKL, TLR4, TLR3</i>                       |
| GO:0071550                  | Death-inducing signaling complex assembly                                      | 9.13E-16       | <i>RIPK1, TRAF2, FADD, CASP8, TRADD</i>                           |
| GO:0035666                  | TRIF-dependent toll-like receptor signaling pathway                            | 1.17E-15       | <i>RIPK1, BIRC2, TLR4, FADD, CASP8, TLR3</i>                      |
| GO:1902041                  | Regulation of extrinsic apoptotic signaling pathway via death domain receptors | 7.20E-14       | <i>RIPK1, TRAF2, FADD, CASP8, TRADD</i>                           |
| GO:0007249                  | I-kappaB kinase/NF-kappaB signaling                                            | 1.11E-13       | <i>RIPK1, TRAF2, BIRC2, TLR4, TLR3, TRADD</i>                     |
| GO:0097190                  | Apoptotic signaling pathway                                                    | 1.88E-13       | <i>RIPK1, TLR4, FADD, CASP8, TLR3, CASP8AP2</i>                   |
| GO:0071260                  | Cellular response to mechanical stimulus                                       | 3.83E-13       | <i>TLR4, FADD, CASP8, TLR3, MAPK8, CASP8AP2</i>                   |



**Table S4.** Top 10 significant GO terms of necroptosis DEGs in terms of biological process

| <b>Significant GO terms</b> | <b>Description</b>                     | <b>P value</b> | <b>Associated genes</b>                                                                               |
|-----------------------------|----------------------------------------|----------------|-------------------------------------------------------------------------------------------------------|
| GO:0042802                  | identical protein binding              | 1.43E-12       | <i>RIPK1, TRAF2, BIRC2, MLKL, TLR4, FADD, CASP8, TLR3, TRADD, TRAF5</i>                               |
| GO:0005164                  | tumor necrosis factor receptor binding | 1.65E-12       | <i>TRAF2, FADD, CASP8, TRADD, TRAF5</i>                                                               |
| GO:0005515                  | protein binding                        | 9.27E-12       | <i>RIPK1, TRAF2, CYLD, BIRC2, JKAMP, MLKL, TLR4, FADD, CASP8, TLR3, TRADD, MAPK8, TRAF5, CASP8AP2</i> |
| GO:0044877                  | protein-containing complex binding     | 1.86E-11       | <i>RIPK1, TRAF2, BIRC2, MLKL, FADD, CASP8, TRADD</i>                                                  |
| GO:0005123                  | death receptor binding                 | 5.99E-11       | <i>RIPK1, FADD, CASP8, CASP8AP2</i>                                                                   |
| GO:0031625                  | ubiquitin protein ligase binding       | 4.32E-08       | <i>RIPK1, TRAF2, JKAMP, CASP8, TRAF5</i>                                                              |
| GO:0035877                  | death effector domain binding          | 3.12E-06       | <i>FADD, CASP8</i>                                                                                    |
| GO:0070513                  | death domain binding                   | 4.54E-06       | <i>RIPK1, TRADD</i>                                                                                   |
| GO:0004706                  | JUN kinase kinase kinase activity      | 1.13E-05       | <i>RIPK1, MLKL</i>                                                                                    |
| GO:0031996                  | thioesterase binding                   | 2.00E-05       | <i>TRAF2, TRAF5</i>                                                                                   |

**Table S5.** List of candidate genes significantly associated with RIPK family among the DEGs

| S.No | Gene Name   | Control | Treated | Up/Down | Function                                            |
|------|-------------|---------|---------|---------|-----------------------------------------------------|
| 1    | BBS7        | 6.7     | 9.7     | ↑       | Cilium biogenesis/degradation, Protein transport    |
| 2    | LRRC75A-AS1 | 5.3     | 8.9     | ↑       | Involved in the assembly of adherens junction       |
| 3    | EXD2        | 3.7     | 9.2     | ↑       | DNA damage and repair mechanism                     |
| 4    | GPR107      | 12.7    | 16.4    | ↑       | Clathrin-dependent endocytosis                      |
| 5    | TUBA4A      | 1.7     | 4.5     | ↑       | Regulation of G2/M transition of mitotic cell cycle |
| 6    | KDM1B       | 4.3     | 5.2     | ↑       | DNA methylation, Regulation of transcription        |
| 7    | TYMP        | 0.8     | 1.6     | ↑       | Angiogenesis, Chemotaxis, Differentiation           |
| 8    | MATR3       | 1.3     | 4.6     | ↑       | Interaction with nuclear matrix proteins            |
| 9    | NRP1        | 3.7     | 1.5     | ↓       | Neurogenesis, Host-virus infection                  |
| 10   | MNX1-AS1    | 3.9     | 2.5     | ↓       | T-box transcription factors, Wnt signaling          |
| 11   | SSRP1       | 1.7     | 1.5     | ↓       | Transcription regulation, Host-virus infection      |
| 12   | PRDX2       | 18      | 14      | ↓       | MAPK activation, Negative regulation of apoptosis   |
| 13   | PLRG1       | 6.3     | 4       | ↓       | mRNA processing & splicing                          |
| 14   | LGALS4      | 1       | 0       | ↓       | Cell adhesion                                       |
| 15   | SNX5        | 7.5     | 5       | ↓       | Endocytosis, Protein transport                      |
| 16   | FXYD3       | 12      | 9       | ↓       | Sodium/potassium ion transport                      |
